# Supplementary material for: RET rearrangements are actionable alterations in breast cancer
Source: PubMed Central journal article supplement (PMC6240119; doi:10.1038/s41467-018-07341-4), 2018-11-16
Supplement: 41467_2018_7341_MOESM3_ESM.pdf [file 41467_2018_7341_MOESM3_ESM.pdf]

## **Description of Additional Supplementary Files**

File Name: Supplementary Data 1

Description: List of genes in the targeted sequencing assay for exonic and intronic capture in version 1 and 2 of the FoundationOne Assay

File Name: Supplementary Data 2

Description: RET variant details, hormone receptor and ERBB2 status, site of origin and tumor purity for 121 RET altered breast cancers.
